# Supplementary material for: Lanthanide complexes with an azo-dye chromophore ligand: syntheses, crystal structures, and near-infrared luminescence by long-wavelength excitation
Source: Royal Society of Chemistry journal article supplement (doi:10.1039/d4dt00577e), 2024-01-01
Supplement: d4dt00577e1.pdf [file d4dt00577e1.pdf]

Lanthanide Complexes with an Azo-dye Chromophore Ligand: Syntheses, Crystal Structures, and Near-infrared Luminescence by Long-wavelength Excitation

Yun-long Chen<sup>a,b</sup>, Min Feng<sup>b,c\*</sup>, Xiaofei Zhu<sup>a\*</sup>, Zhiping Zheng<sup>b,c\*</sup>

*a School of Chemistry and Life Science, Changchun University of Technology, Changchun, 130012, China*

*b Department of Chemistry, Southern University of Science and Technology, Shenzhen, 518055, China*

*c Key University Laboratory of Rare Earth Chemistry of Guangdong, Southern University of Science and Technology, Shenzhen, Guangdong 518055.*

E-mail addresses: [fengm@sustech.edu.cn](mailto:fengm@sustech.edu.cn) (M. Feng), [zhuxiaofei@ccut.edu.cn](mailto:zhuxiaofei@ccut.edu.cn) (X. Zhu), [zhengzp@sustech.edu.cn](mailto:zhengzp@sustech.edu.cn) (Z. Zheng)

## Contents

|                                                                                                                                                                                                                               |    |
|-------------------------------------------------------------------------------------------------------------------------------------------------------------------------------------------------------------------------------|----|
| Table S1. X-ray Crystallographic Data for 1-3.                                                                                                                                                                                | 3  |
| Table S2. X-ray Crystallographic Data for 4-6.                                                                                                                                                                                | 4  |
| Table S3. Selected bonds lengths [Å] for 1-3.                                                                                                                                                                                 | 5  |
| Table S4. Selected bonds lengths [Å] for 4-6.                                                                                                                                                                                 | 5  |
| Table S5. Coordination geometry of complexes 1-6.                                                                                                                                                                             | 5  |
| Table S6. TD-DFT calculated excitation energies and main compositions of the low-lying electronic transitions for $\text{H}_2\text{C}_2\text{R}^{2-}$ .                                                                       | 6  |
| Table S7. TD-DFT calculated excitation energies and main compositions of the low-lying electronic transitions for $[\text{Lu}_2(\text{HC}_2\text{R})_2(\text{DMSO})_{10}]$ .                                                  | 7  |
| Figure S1. The molecular structures of complexes 1 (a) and 9 (b) with the main planes of their ligands. All H atoms are omitted except the H on N. Color code: Cyan (Er), Red (O), Blue (N), Yellow (S), Gray (C), White (H). | 8  |
| Figure S2. Powder X-ray diffraction patterns of complexes 1-3 and 4-6 (b).                                                                                                                                                    | 8  |
| Figure S3. The molecular orbitals of $\text{H}_2\text{C}_2\text{R}^{2-}$ .                                                                                                                                                    | 9  |
| Figure S4. The S1, S3, S4, S8, S10, S11 ( $f > 0.03$ ) hole and electron distributions of $\text{H}_2\text{C}_2\text{R}^{2-}$ . Pink: hole, cyan: electron.                                                                   | 10 |
| Figure S5. The molecular orbitals of $[\text{Lu}_2(\text{HC}_2\text{R})_2(\text{DMSO})_{10}]$ .                                                                                                                               | 11 |
| Figure S6. The S1, S5, S11, S19, S21, S34 ( $f > 0.01$ ) Hole and electron distributions of $[\text{Lu}_2(\text{HC}_2\text{R})_2(\text{DMSO})_{10}]$ . Pink: hole, cyan: electron.                                            | 12 |
| Figure S7. UV-vis absorption spectra of ligand $\text{Na}_2\text{H}_2\text{C}_2\text{R}$ and complexes 1-6 in solid state.                                                                                                    | 13 |
| Figure S8. Energy level diagram for Ln complexes sensitized via a ligand-centered triplet excited state.                                                                                                                      | 13 |
| Figure S9. Emission spectra of 1 and 4.                                                                                                                                                                                       | 14 |
| Figure S10. NIR luminescence decay curve of complex 4 at 980 nm.                                                                                                                                                              | 14 |
| Figure S11. NIR emission (a) and excitation spectra (b) of 2 and 5.                                                                                                                                                           | 15 |
| Figure S12. Emission spectra of 1 under $\lambda_{\text{ex}} = 465\text{--}751$ nm.                                                                                                                                           | 15 |
| Figure S13. Emission spectra of 1 under $\lambda_{\text{ex}} = 346\text{--}746$ nm.                                                                                                                                           | 16 |
| Figure S14. Phosphorescent spectrum of complex 3 at room temperature.                                                                                                                                                         | 16 |
| Figure S15. The absolute QY measurement of 4 ( $\lambda_{\text{ex}} = 659$ nm). Results via FLS1000 – Integrating Sphere                                                                                                      | 17 |

**Table S1.** X-ray Crystallographic Data for **1-3**.

| complex                                    | 1                                                        | 2                                                        | 3                                                        |
|--------------------------------------------|----------------------------------------------------------|----------------------------------------------------------|----------------------------------------------------------|
| Empirical formula                          | $C_{32}H_{54}Yb_2N_4O_{34}S_4$                           | $C_{32}H_{54}Er_2N_4O_{34}S_4$                           | $C_{32}H_{54}Gd_2N_4O_{34}S_4$                           |
| Formula weight                             | 1513.11                                                  | 1501.55                                                  | 1481.53                                                  |
| Temperature/K                              | 100.02                                                   | 100.05                                                   | 99.99                                                    |
| Crystal system                             | monoclinic                                               | monoclinic                                               | monoclinic                                               |
| Space group                                | $P2_1/n$                                                 | $P2_1/n$                                                 | $P2_1/n$                                                 |
| a/Å                                        | 15.1083(9)                                               | 15.1450(6)                                               | 15.2177(10)                                              |
| b/Å                                        | 7.4003(5)                                                | 7.4186(3)                                                | 7.4551(4)                                                |
| c/Å                                        | 23.3340(14)                                              | 23.3610(8)                                               | 23.3788(13)                                              |
| $\alpha/^\circ$                            | 90                                                       | 90                                                       | 90                                                       |
| $\beta/^\circ$                             | 107.382(3)                                               | 107.3690(10)                                             | 107.394(2)                                               |
| $\gamma/^\circ$                            | 90                                                       | 90                                                       | 90                                                       |
| Volume/Å <sup>3</sup>                      | 2489.7(3)                                                | 2505.04(17)                                              | 2531.0(3)                                                |
| Z                                          | 2                                                        | 2                                                        | 2                                                        |
| $\rho_{calc}/cm^3$                         | 2.018                                                    | 1.991                                                    | 1.944                                                    |
| $\mu/mm^{-1}$                              | 4.009                                                    | 3.602                                                    | 2.869                                                    |
| F(000)                                     | 1500                                                     | 1492                                                     | 1476                                                     |
| Radiation                                  | MoK $\alpha$<br>( $\lambda = 0.71073$ )                  | MoK $\alpha$<br>( $\lambda = 0.71073$ )                  | MoK $\alpha$<br>( $\lambda = 0.71073$ )                  |
| Reflections collected                      | 25613                                                    | 30812                                                    | 20817                                                    |
| Independent reflections                    | 6421<br>[ $R_{int} = 0.0953$ ,<br>$R_{sigma} = 0.0920$ ] | 5775<br>[ $R_{int} = 0.0638$ ,<br>$R_{sigma} = 0.0452$ ] | 5213<br>[ $R_{int} = 0.0747$ ,<br>$R_{sigma} = 0.0665$ ] |
| Data/restraints/parameters                 | 6421/1/360                                               | 5775/0/360                                               | 5213/1/360                                               |
| Goodness-of-fit on F <sup>2</sup>          | 1.007                                                    | 1.04                                                     | 1.042                                                    |
| Final R indexes [ $I > 2\sigma(I)$ ]       | $R_I = 0.0455$ ,<br>$wR_2 = 0.0794$                      | $R_I = 0.0301$ ,<br>$wR_2 = 0.0663$                      | $R_I = 0.0395$ ,<br>$wR_2 = 0.0864$                      |
| Final R indexes [all data]                 | $R_I = 0.0850$ ,<br>$wR_2 = 0.0936$                      | $R_I = 0.0301$ ,<br>$wR_2 = 0.0663$                      | $R_I = 0.0538$ ,<br>$wR_2 = 0.0929$                      |
| Largest diff. peak/hole / eÅ <sup>-3</sup> | 1.25/-1.55                                               | 1.19/-1.16                                               | 1.34/-1.06                                               |
| CCDC number                                | 2303845                                                  | 2303847                                                  | 2303852                                                  |

**Table S2.** X-ray Crystallographic Data for **4-6**.

| complex                                     | 4                                                                                              | 5                                                                                              | 6                                                                                              |
|---------------------------------------------|------------------------------------------------------------------------------------------------|------------------------------------------------------------------------------------------------|------------------------------------------------------------------------------------------------|
| Empirical formula                           | C <sub>52</sub> H <sub>90</sub> Yb <sub>2</sub> N <sub>4</sub> O <sub>28</sub> S <sub>16</sub> | C <sub>52</sub> H <sub>90</sub> Er <sub>2</sub> N <sub>4</sub> O <sub>28</sub> S <sub>16</sub> | C <sub>52</sub> H <sub>90</sub> Gd <sub>2</sub> N <sub>4</sub> O <sub>28</sub> S <sub>16</sub> |
| Formula weight                              | 2126.35                                                                                        | 2114.79                                                                                        | 2094.77                                                                                        |
| Temperature/K                               | 100                                                                                            | 100                                                                                            | 100.02                                                                                         |
| Crystal system                              | triclinic                                                                                      | triclinic                                                                                      | triclinic                                                                                      |
| Space group                                 | <i>P</i> -1                                                                                    | <i>P</i> -1                                                                                    | <i>P</i> -1                                                                                    |
| a/Å                                         | 11.2546(8)                                                                                     | 11.2494(6)                                                                                     | 11.2789(8)                                                                                     |
| b/Å                                         | 14.4042(9)                                                                                     | 14.5051(7)                                                                                     | 14.5397(11)                                                                                    |
| c/Å                                         | 15.0132(9)                                                                                     | 15.0460(8)                                                                                     | 15.0454(11)                                                                                    |
| α/°                                         | 113.027(3)                                                                                     | 113.056(3)                                                                                     | 113.012(3)                                                                                     |
| β/°                                         | 90.449(4)                                                                                      | 90.302(3)                                                                                      | 90.218(3)                                                                                      |
| γ/°                                         | 111.806(4)                                                                                     | 111.853(3)                                                                                     | 111.884(2)                                                                                     |
| Volume/Å <sup>3</sup>                       | 2046.0(2)                                                                                      | 2063.62(19)                                                                                    | 2074.8(3)                                                                                      |
| Z                                           | 1                                                                                              | 1                                                                                              | 1                                                                                              |
| ρ <sub>calc</sub> /cm <sup>3</sup>          | 1.726                                                                                          | 1.702                                                                                          | 1.677                                                                                          |
| μ/mm <sup>-1</sup>                          | 10.4                                                                                           | 9.526                                                                                          | 2.063                                                                                          |
| F(000)                                      | 1074                                                                                           | 1070                                                                                           | 1062                                                                                           |
| Radiation                                   | GaKα<br>(λ = 1.34139)                                                                          | GaKα<br>(λ = 1.34139)                                                                          | MoKα<br>(λ = 0.71073)                                                                          |
| Reflections collected                       | 51458<br>9428                                                                                  | 24195<br>7841                                                                                  | 26624<br>9543                                                                                  |
| Independent reflections                     | [R <sub>int</sub> = 0.0857,<br>R <sub>sigma</sub> = 0.0624]                                    | [R <sub>int</sub> = 0.0747,<br>R <sub>sigma</sub> = 0.0895]                                    | [R <sub>int</sub> = 0.0622,<br>R <sub>sigma</sub> = 0.0755]                                    |
| Data/restraints/parameters                  | 9428/0/452                                                                                     | 7841/0/452                                                                                     | 9543/0/452                                                                                     |
| Goodness-of-fit on F <sup>2</sup>           | 1.105                                                                                          | 1.064                                                                                          | 1.016                                                                                          |
| Final R indexes [I>=2σ (I)]                 | R <sub>1</sub> = 0.0425,<br>wR <sub>2</sub> = 0.1046                                           | R <sub>1</sub> = 0.0504,<br>wR <sub>2</sub> = 0.1158                                           | R <sub>1</sub> = 0.0393,<br>wR <sub>2</sub> = 0.0772                                           |
| Final R indexes [all data]                  | R <sub>1</sub> = 0.0533,<br>wR <sub>2</sub> = 0.1078                                           | R <sub>1</sub> = 0.0668,<br>wR <sub>2</sub> = 0.1211                                           | R <sub>1</sub> = 0.0572,<br>wR <sub>2</sub> = 0.0824                                           |
| Largest diff. peak/hole / e Å <sup>-3</sup> | 0.79/-1.53                                                                                     | 0.78/-1.41                                                                                     | 1.81/-0.96                                                                                     |
| CCDC number                                 | 2303867                                                                                        | 23038468                                                                                       | 2303869                                                                                        |

**Table S3.** Selected bonds lengths [Å] for **1-3**.

|                     | 1        | 2        | 3        |
|---------------------|----------|----------|----------|
| Atom                | Length   | Length   | Length   |
| Ln1-O1              | 2.242(4) | 2.269(3) | 2.313(3) |
| Ln1-O2              | 2.207(4) | 2.232(3) | 2.274(3) |
| Ln1-O4 <sup>1</sup> | 2.427(4) | 2.426(3) | 2.454(3) |
| Ln1-O1W             | 2.337(4) | 2.362(3) | 2.416(4) |
| Ln1-O2W             | 2.302(4) | 2.320(3) | 2.367(4) |
| Ln1-O3W             | 2.397(4) | 2.417(3) | 2.459(3) |
| Ln1-O4W             | 2.293(4) | 2.320(3) | 2.377(4) |
| Ln1-O5W             | 2.393(4) | 2.421(3) | 2.459(4) |

O4<sup>1</sup> is the oxygen on an adjacent ligand (HC2R).

**Table S4.** Selected bonds lengths [Å] for **4-6**.

|                    | 4        | 5        | 6        |
|--------------------|----------|----------|----------|
| Atom               | Length   | Length   | Length   |
| Ln-O1              | 2.270(3) | 2.301(4) | 2.353(3) |
| Ln-O2              | 2.285(3) | 2.318(4) | 2.360(3) |
| Ln-O8 <sup>1</sup> | 2.324(3) | 2.352(4) | 2.391(3) |
| Ln-O9              | 2.279(3) | 2.315(4) | 2.363(3) |
| Ln-O10             | 2.423(3) | 2.390(3) | 2.467(3) |
| Ln-O11             | 2.374(3) | 2.434(4) | 2.423(3) |
| Ln-O12             | 2.269(3) | 2.306(4) | 2.342(3) |
| Ln-O13             | 2.282(3) | 2.281(4) | 2.352(3) |

O8<sup>1</sup> is the oxygen on an adjacent ligand (HC2R).

**Table S5.** Coordination geometry of complexes **1-6**.

| Eight-Coordinated Metal centers |                         |                            |                           |                             |                            |                           |                         |
|---------------------------------|-------------------------|----------------------------|---------------------------|-----------------------------|----------------------------|---------------------------|-------------------------|
|                                 | <i>O<sub>h</sub></i> CU | <i>D<sub>4d</sub></i> SAPR | <i>D<sub>2d</sub></i> TDD | <i>C<sub>2v</sub></i> JBTPR | <i>C<sub>2v</sub></i> BTPR | <i>D<sub>2d</sub></i> JSD | <i>T<sub>d</sub></i> TT |
| 1                               | 9.735                   | 2.402                      | 0.376                     | 2.337                       | 2.139                      | 2.485                     | 10.438                  |
| 2                               | 9.82                    | 2.461                      | 0.413                     | 2.422                       | 2.188                      | 2.558                     | 10.525                  |
| 3                               | 9.799                   | 2.534                      | 0.447                     | 2.56                        | 2.277                      | 2.697                     | 10.546                  |
| 4                               | 10.213                  | 3.066                      | 0.374                     | 2.75                        | 2.176                      | 2.288                     | 10.838                  |
| 5                               | 10.161                  | 3.002                      | 0.36                      | 2.804                       | 2.139                      | 2.321                     | 10.803                  |
| 6                               | 10.058                  | 2.977                      | 0.375                     | 2.877                       | 2.143                      | 2.484                     | 10.754                  |

CU: Cube; SAPR: Square antiprism; TDD: Triangular dodecahedron; JBTPR: Biaugmented trigonal prism J50; BTPR: Biaugmented trigonal prism; JSD: Snub diphenoid J84; TT: Triakis tetrahedron.

HPY: Hexagonal pyramid; PBPY: Pentagonal bipyramid; COC: Capped octahedron; CTPR: Capped trigonal prism; JPBPY: Johnson pentagonal bipyramid J13; JETPY: Johnson elongated triangular pyramid J7.

**Table S6.** TD-DFT calculated excitation energies and main compositions of the low-lying electronic transitions for H<sub>2</sub>C2R<sup>2-</sup>.

| Excited state | E (eV) | E (nm) | f      | Transition      | Contribution | Assignment                                      |
|---------------|--------|--------|--------|-----------------|--------------|-------------------------------------------------|
| 1             | 2.5834 | 480    | 0.6944 | HOMO → LUMO     | 98.70%       | $\pi \rightarrow \pi^*$ $\pi \rightarrow \pi^*$ |
|               |        |        |        | HOMO-1 → LUMO   | 72.70%       | $\pi \rightarrow \pi^*$                         |
| 3             | 3.3932 | 365    | 0.3519 | HOMO-3 → LUMO   | 14.80%       | $\pi \rightarrow \pi^*$ $\pi \rightarrow \pi^*$ |
|               |        |        |        | HOMO-2 → LUMO   | 9.50%        | $\pi \rightarrow \pi^*$                         |
| 4             | 3.4636 | 358    | 0.0348 | HOMO-2 → LUMO   | 89.60%       | $n \rightarrow \pi^*$ $n \rightarrow \pi^*$     |
|               |        |        |        | HOMO-1 → LUMO   | 6.40%        | $\pi \rightarrow \pi^*$                         |
| 8             | 4.2243 | 294    | 0.1751 | HOMO → LUMO+1   | 80.30%       | $\pi \rightarrow \pi^*$ $\pi \rightarrow \pi^*$ |
|               |        |        |        | HOMO-7 → LUMO   | 13.70%       | $\pi \rightarrow \pi^*$                         |
| 10            | 4.4906 | 276    | 0.1389 | HOMO-7 → LUMO   | 71.40%       | $\pi \rightarrow \pi^*$                         |
|               |        |        |        | HOMO → LUMO+1   | 9.10%        | $\pi \rightarrow \pi^*$ $\pi \rightarrow \pi^*$ |
| 11            | 4.5563 | 272    | 0.1485 | HOMO → LUMO+2   | 76.50%       | $\pi \rightarrow \pi^*$ $\pi \rightarrow \pi^*$ |
|               |        |        |        | HOMO-7 → LUMO   | 5.30%        | $\pi \rightarrow \pi^*$                         |
| 14            | 4.788  | 259    | 0.1068 | HOMO → LUMO+3   | 62.50%       | $\pi \rightarrow \pi^*$                         |
|               |        |        |        | HOMO-10 → LUMO  | 11.70%       | $\pi \rightarrow \pi^*$ $\pi \rightarrow \pi^*$ |
| 23            | 5.4006 | 230    | 0.5475 | HOMO → LUMO+2   | 5.00%        | $\pi \rightarrow \pi^*$                         |
|               |        |        |        | HOMO-1 → LUMO+1 | 49.90%       | $\pi \rightarrow \pi^*$                         |
| 23            | 5.4006 | 230    | 0.5475 | HOMO-3 → LUMO+1 | 26.10%       | $\pi \rightarrow \pi^*$ $\pi \rightarrow \pi^*$ |
|               |        |        |        | HOMO → LUMO+3   | 6.80%        | $\pi \rightarrow \pi^*$                         |

**Table S7.** TD-DFT calculated excitation energies and main compositions of the low-lying electronic transitions for [Lu<sub>2</sub>(HC<sub>2</sub>R)<sub>2</sub>(DMSO)<sub>10</sub>].

| Excited state | E (eV) | E (nm) | f      | Transition       | Contribution | Assignment       |
|---------------|--------|--------|--------|------------------|--------------|------------------|
| 1             | 1.4963 | 829    | 0.0172 | HOMO → LUMO      | 50.70%       | n → π*           |
|               |        |        |        | HOMO-1 → LUMO+1  | 48.70%       | n → π*           |
| 5             | 2.0984 | 591    | 0.3951 | HOMO-2 → LUMO    | 47.40%       | π → π*           |
|               |        |        |        | HOMO-3 → LUMO+1  | 44.10%       | π → π*           |
| 11            | 2.6485 | 468    | 0.5621 | HOMO-4 → LUMO    | 35.20%       | π → π*           |
|               |        |        |        | HOMO-5 → LUMO+1  | 34.70%       | π → π*           |
|               |        |        |        | HOMO-6 → LUMO    | 11.30%       | π, σ → π* π → π* |
|               |        |        |        | HOMO-7 → LUMO+1  | 9.60%        | π, σ → π*        |
| 19            | 3.3305 | 372    | 0.0164 | HOMO-14 → LUMO   | 24.60%       | σ, π → π*        |
|               |        |        |        | HOMO-15 → LUMO+1 | 22.10%       | σ, π → π*        |
|               |        |        |        | HOMO-12 → LUMO   | 12.80%       | π → π* σ, π → π* |
|               |        |        |        | HOMO-10 → LUMO   | 8.50%        | π → π*           |
| 21            | 3.357  | 369    | 0.0711 | HOMO-19 → LUMO+1 | 8.00%        | σ, π → π*        |
|               |        |        |        | HOMO-11 → LUMO+1 | 7.00%        | π → π*           |
|               |        |        |        | HOMO-10 → LUMO   | 41.70%       | π → π*           |
|               |        |        |        | HOMO-11 → LUMO+1 | 38.10%       | π → π* π → π*    |
| 34            | 3.6237 | 342    | 0.3428 | HOMO-12 → LUMO   | 6.50%        | π → π*           |
|               |        |        |        | HOMO-13 → LUMO+1 | 39.40%       | π → π*           |
| 34            | 3.6237 | 342    | 0.3428 | HOMO-12 → LUMO   | 26.60%       | π → π* π → π*    |
|               |        |        |        | HOMO-14 → LUMO   | 16.30%       | σ, π → π*        |

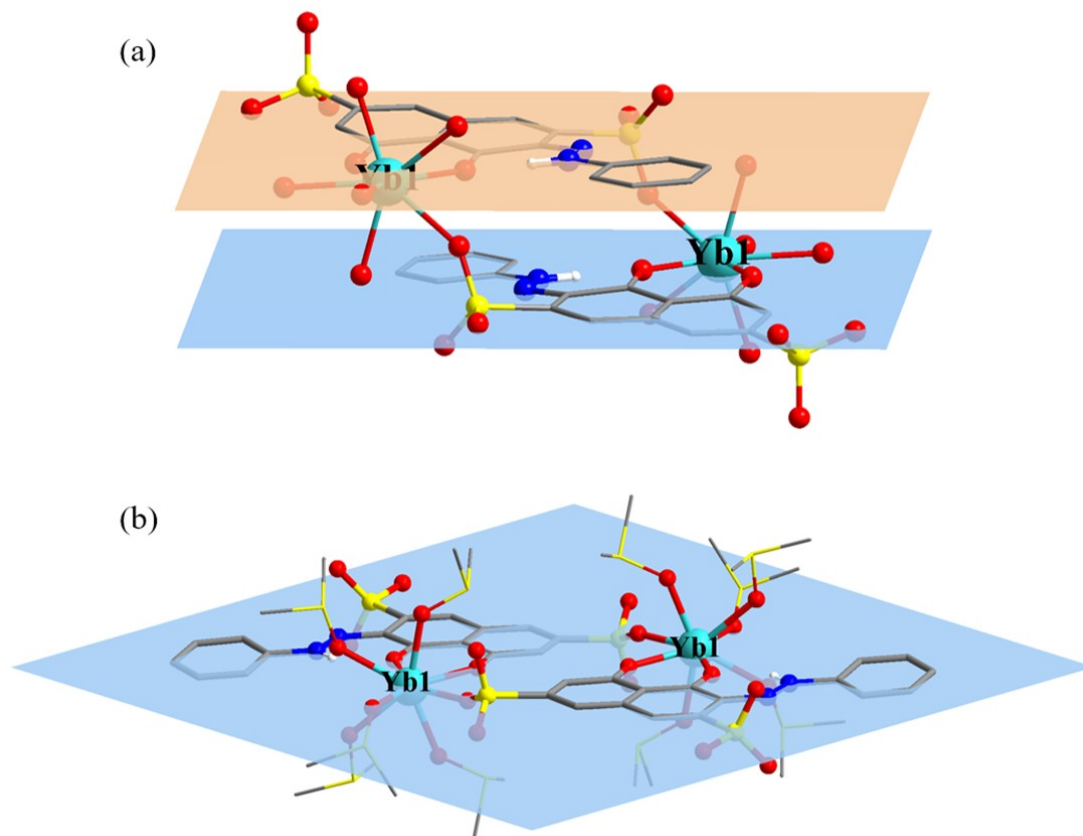

**Figure S1.** The molecular structures of complexes **1** (a) and **9** (b) with the main planes of their ligands. All H atoms are omitted except the H on N. Color code: Cyan (Er), Red (O), Blue (N), Yellow (S), Gray (C), White (H).

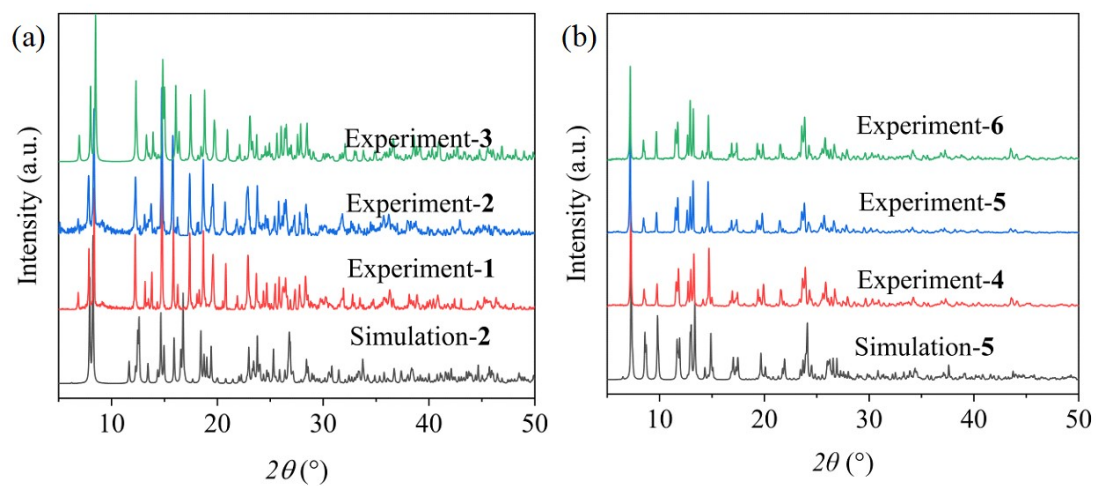

**Figure S2.** Powder X-ray diffraction patterns of complexes **1-3** and **4-6** (b).



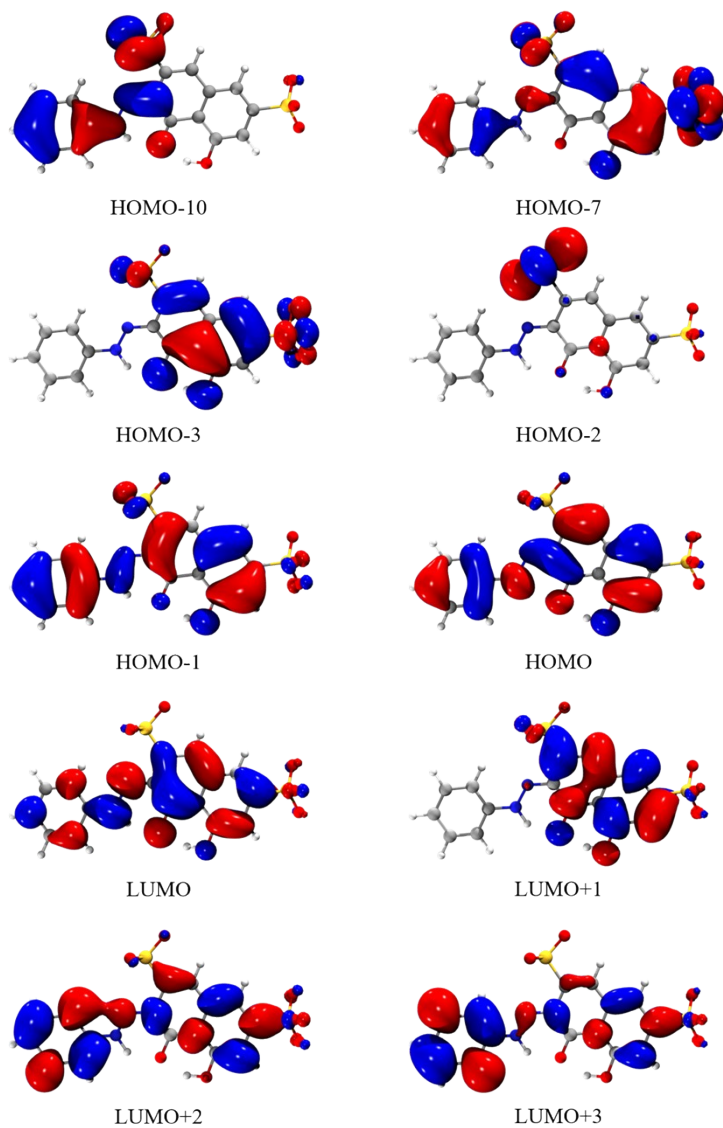

**Figure S3.** The molecular orbitals of  $\text{H}_2\text{C}_2\text{R}^{2-}$ .

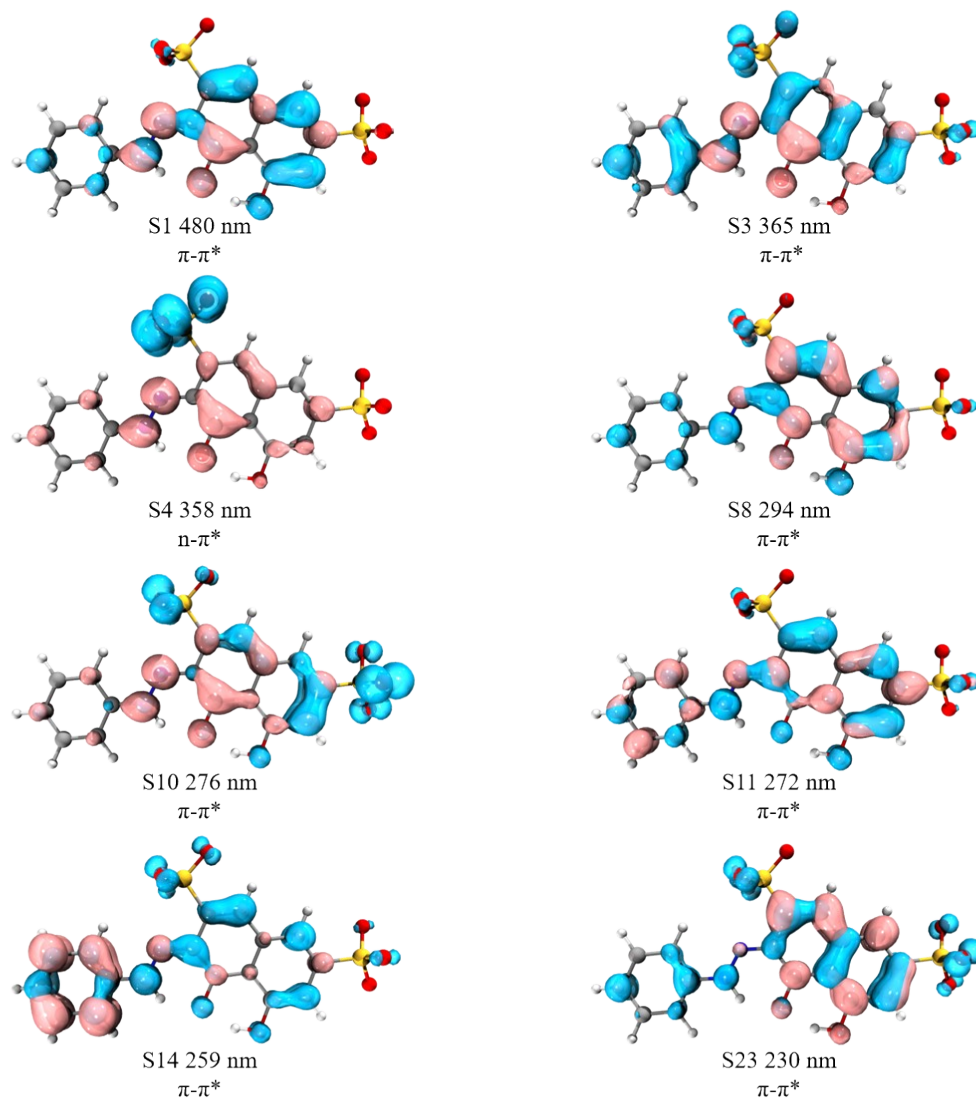

**Figure S4.** The S1, S3, S4, S8, S10, S11 ( $f > 0.03$ ) hole and electron distributions of  $\text{H}_2\text{C}_2\text{R}^2$ . Pink: hole, cyan: electron.

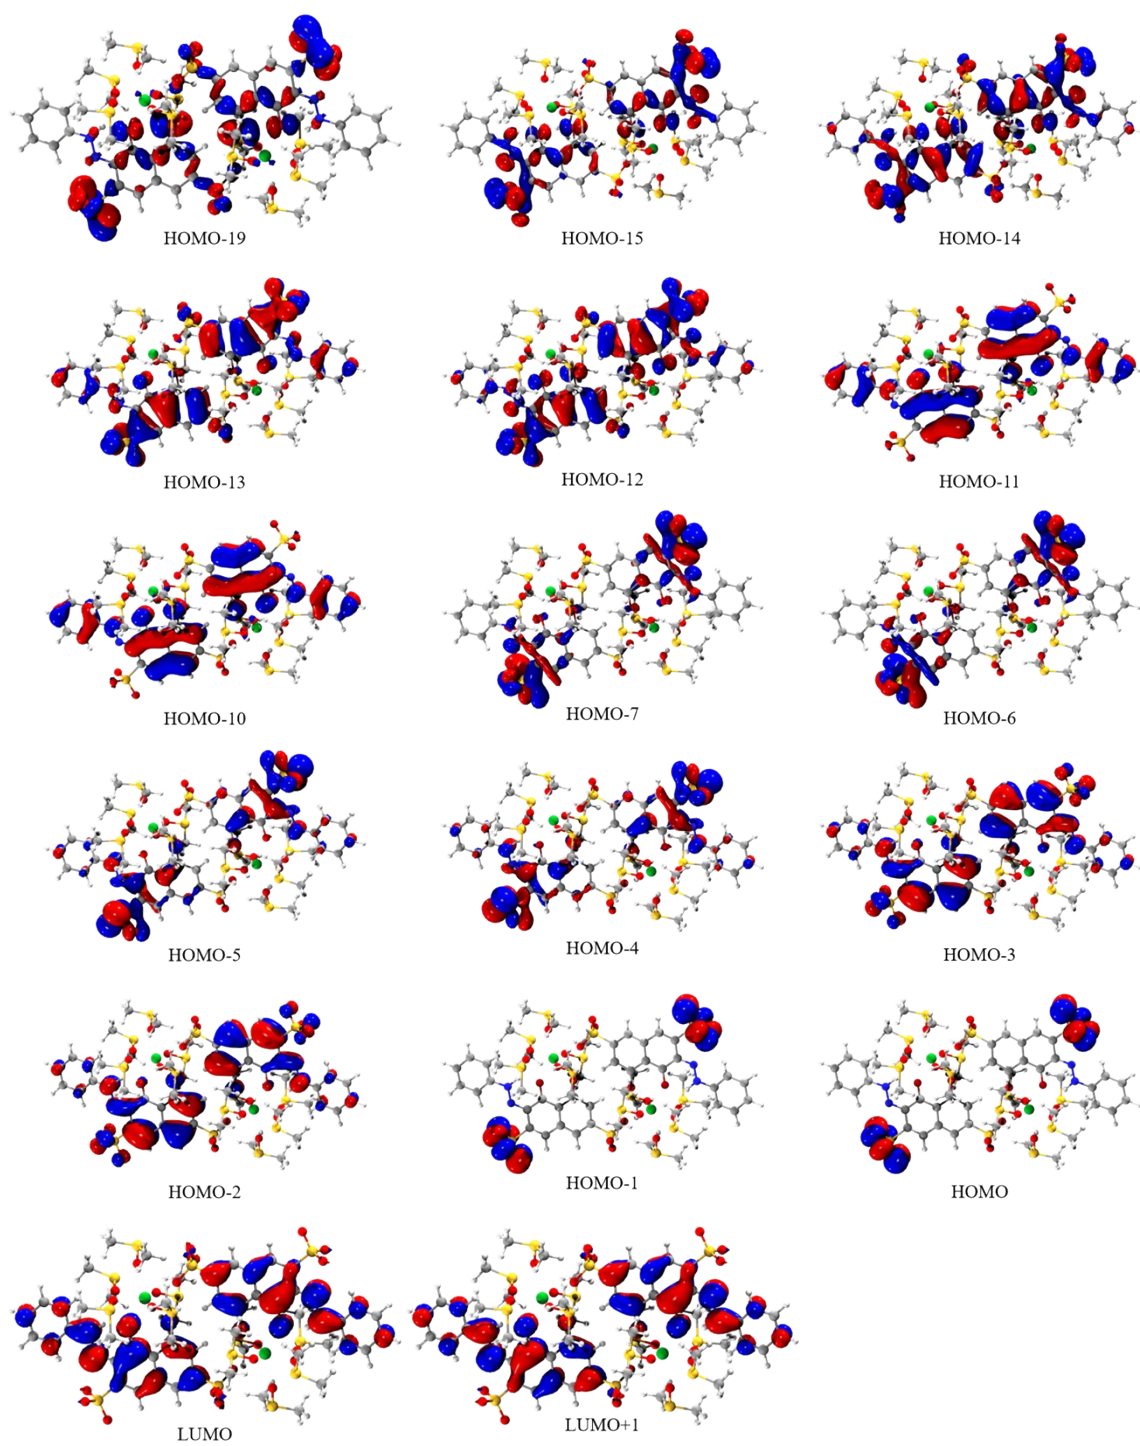

**Figure S5.** The molecular orbitals of  $[\text{Lu}_2(\text{HC}_2\text{R})_2(\text{DMSO})_{10}]$ .

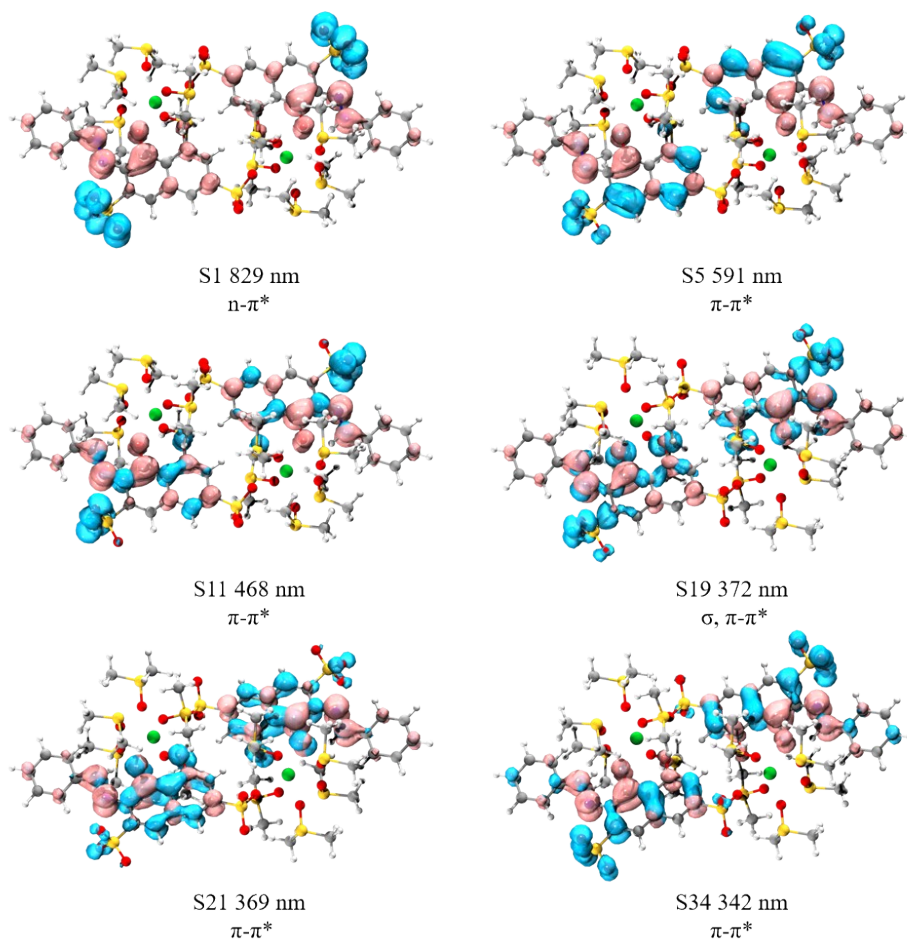

**Figure S6.** The S1, S5, S11, S19, S21, S34 ( $f > 0.01$ ) Hole and electron distributions of  $[\text{Lu}_2(\text{HC}_2\text{R})_2(\text{DMSO})_{10}]$ . Pink: hole, cyan: electron.

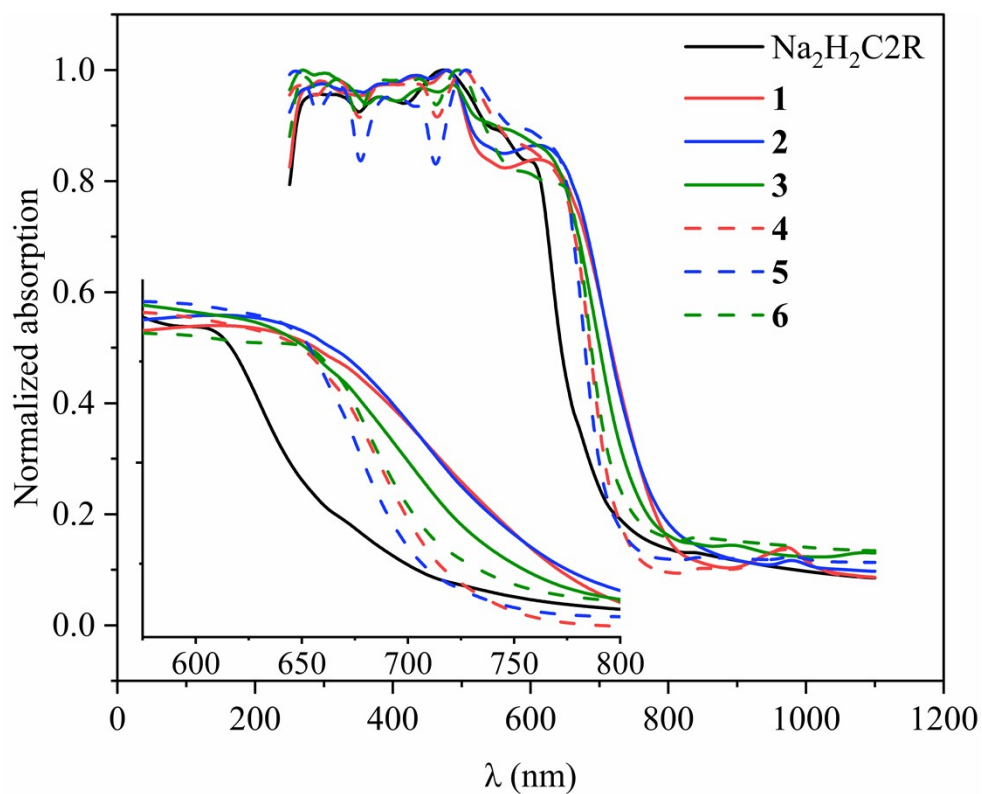

**Figure S7.** UV-vis absorption spectra of ligand  $\text{Na}_2\text{H}_2\text{C}_2\text{R}$  and complexes 1-6 in solid state.

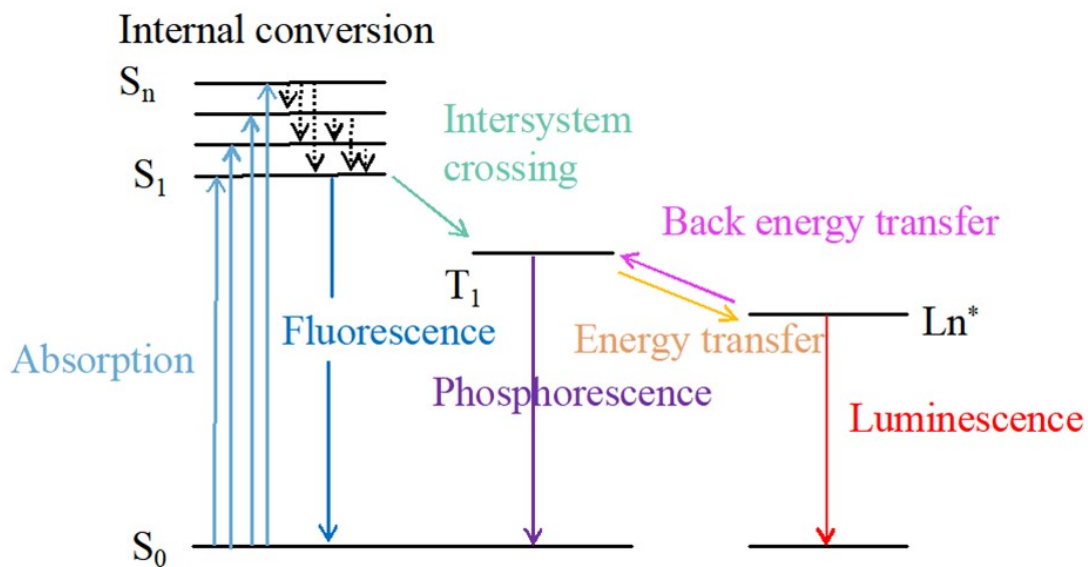

**Figure S8.** Energy level diagram for Ln complexes sensitized via a ligand-centered triplet excited state.

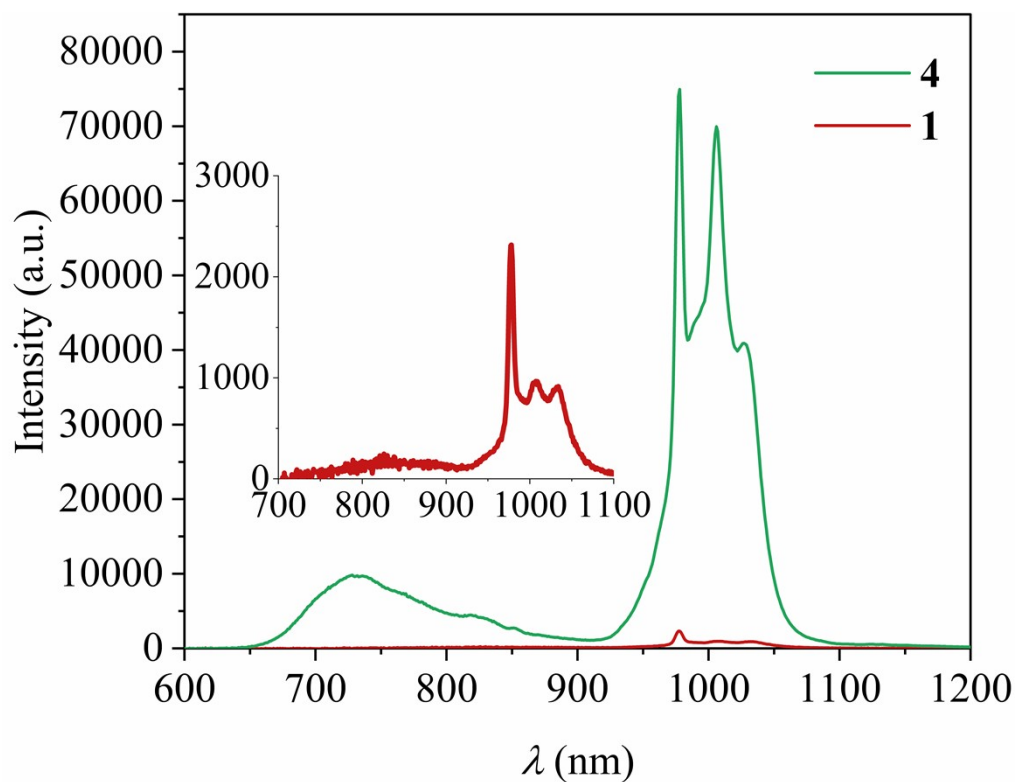

Figure S9. Emission spectra of **1** and **4**.

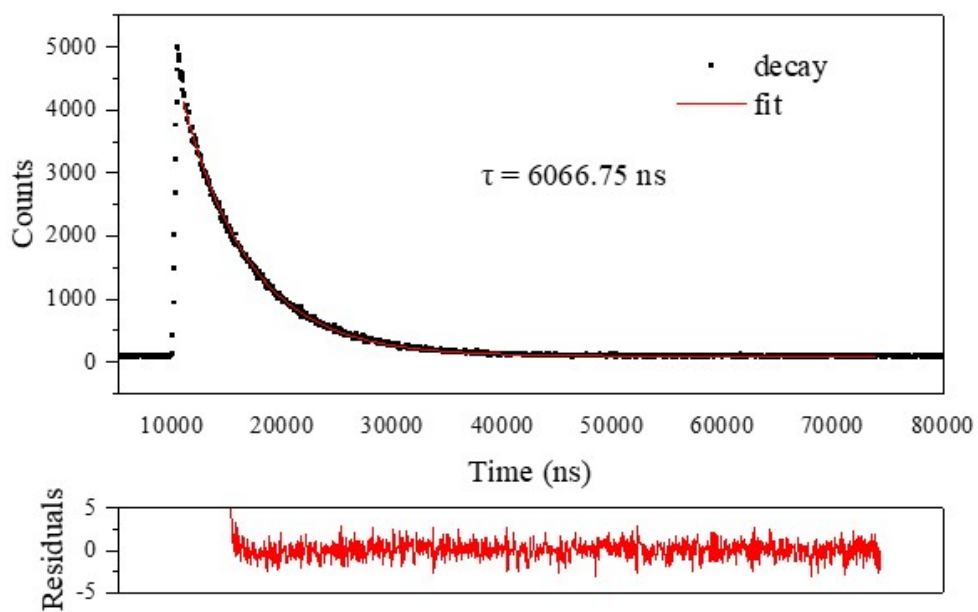

Figure S10. NIR luminescence decay curve of complex **4** at 980 nm.



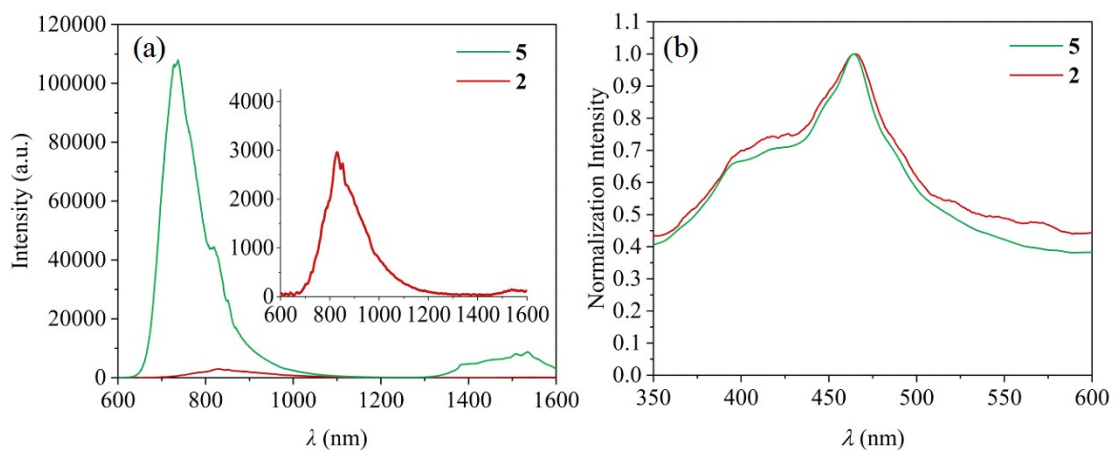

**Figure S11.** NIR emission (a) and excitation spectra (b) of **2** and **5**.

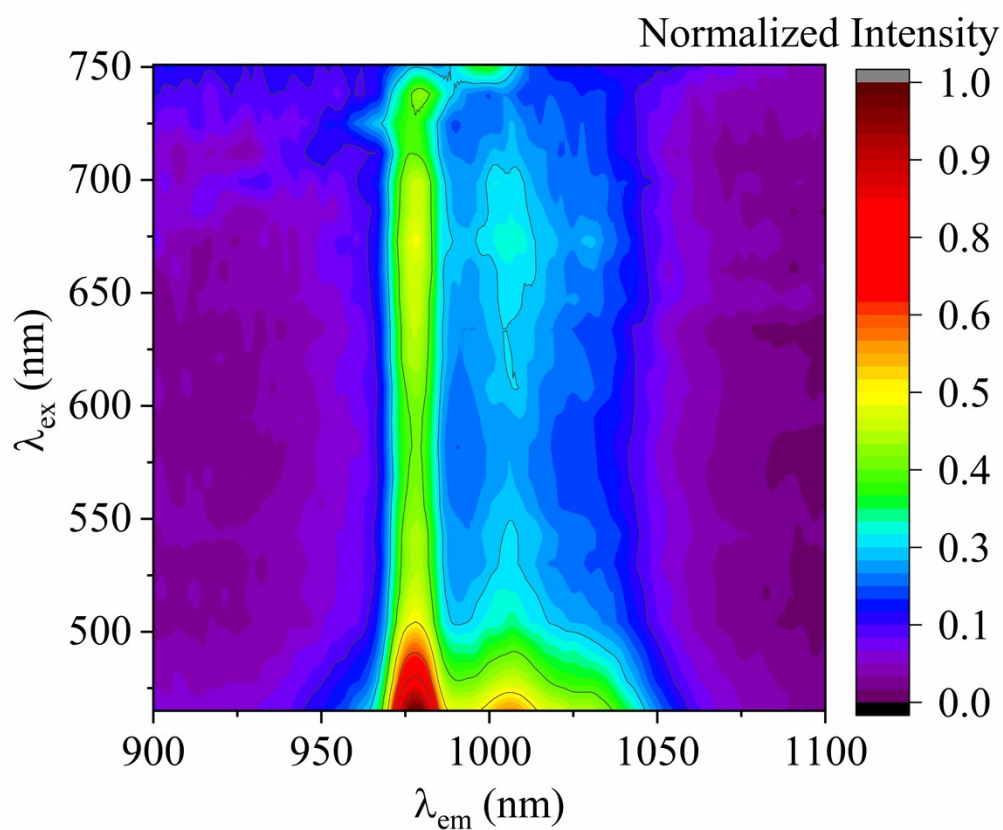

**Figure S12.** Emission spectra of **1** under  $\lambda_{\text{ex}} = 465\text{--}751$  nm.

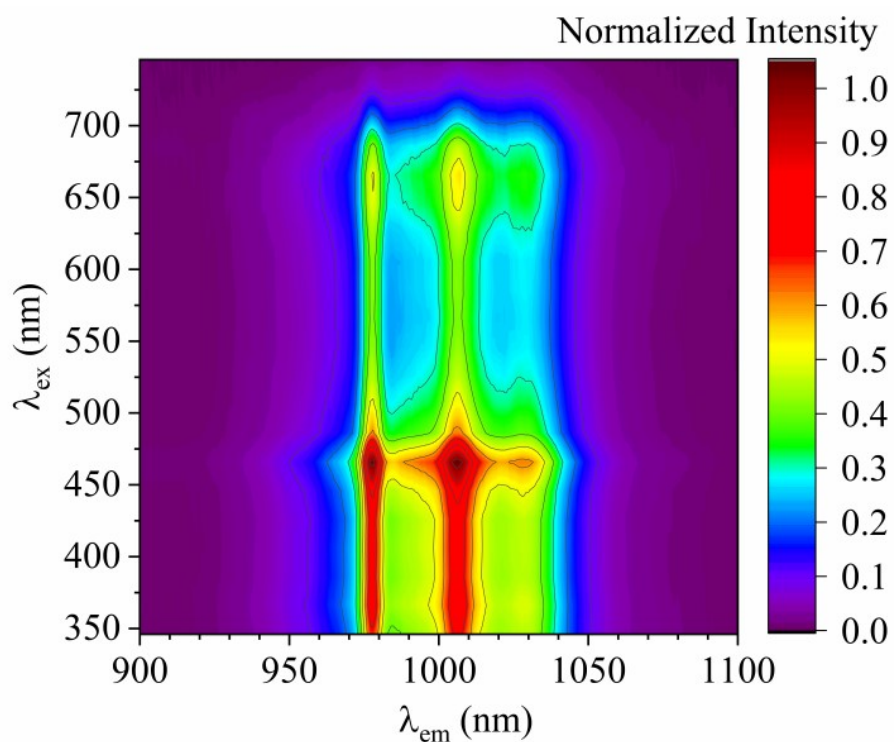

**Figure S13.** Emission spectra of **1** under  $\lambda_{\text{ex}} = 346\text{--}746$  nm.

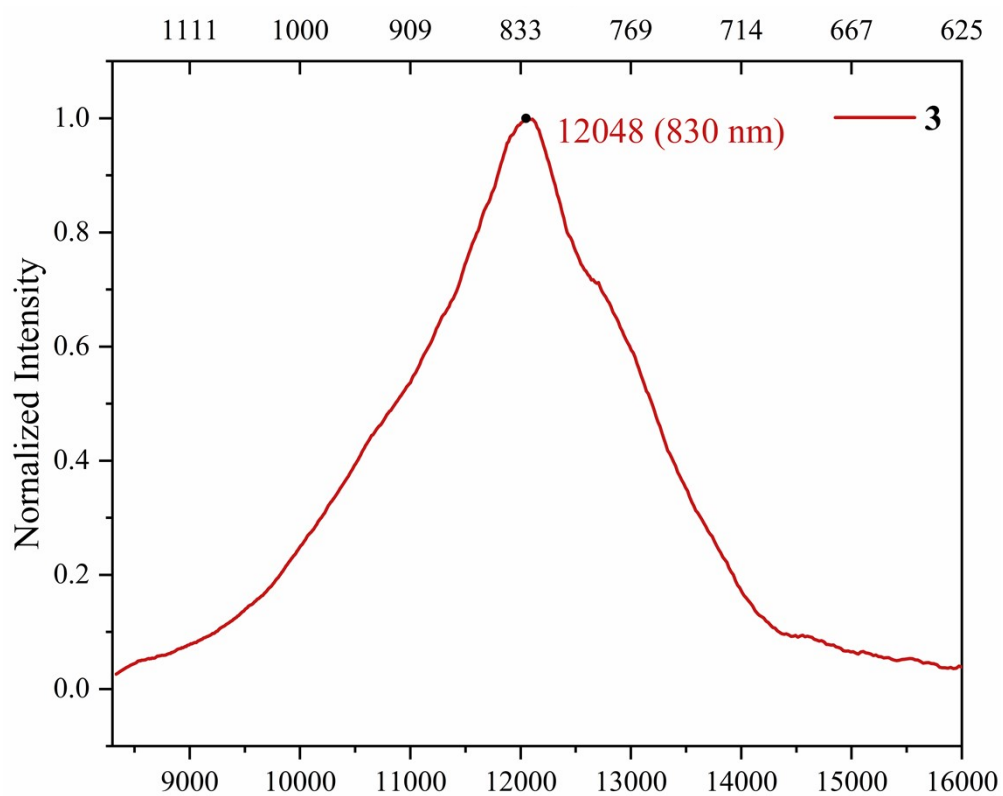

**Figure S14.** Phosphorescent spectrum of complex **3** at room temperature.



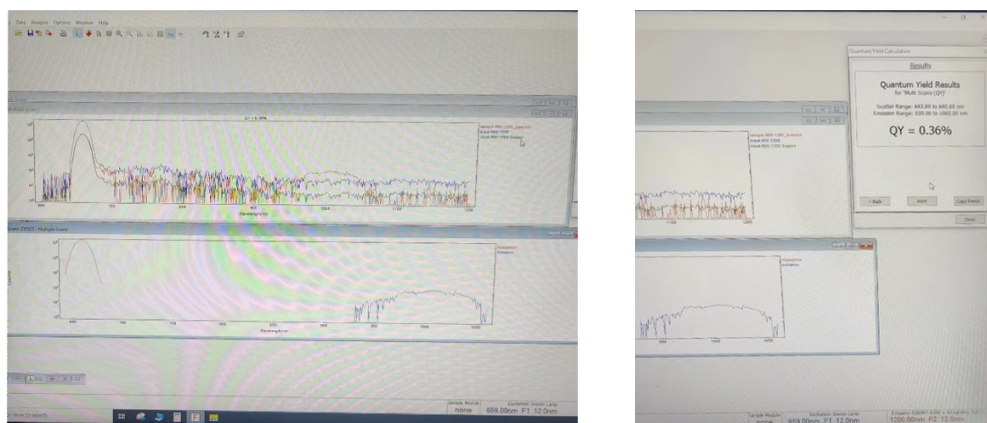

**Figure S15.** The absolute QY measurement of **4** ( $\lambda_{\text{ex}} = 659 \text{ nm}$ ). Results via FLS1000 – Integrating Sphere
